# Supplementary material for: Safety, Tolerability, and Preliminary Efficacy of the Anti-Fibrotic Small Molecule PRI-724, a CBP/β-Catenin Inhibitor, in Patients with Hepatitis C Virus-related Cirrhosis: A Single-Center, Open-Label, Dose Escalation Phase 1 Trial
Source: PubMed Central journal article supplement — eBioMedicine. 2017 Aug 19;23:79–87. doi: 10.1016/j.ebiom.2017.08.016 (PMC5605374; doi:10.1016/j.ebiom.2017.08.016), 2017-08-19
Supplement: mmc1.pdf [file mmc1.pdf]

## **Supplemental Data**

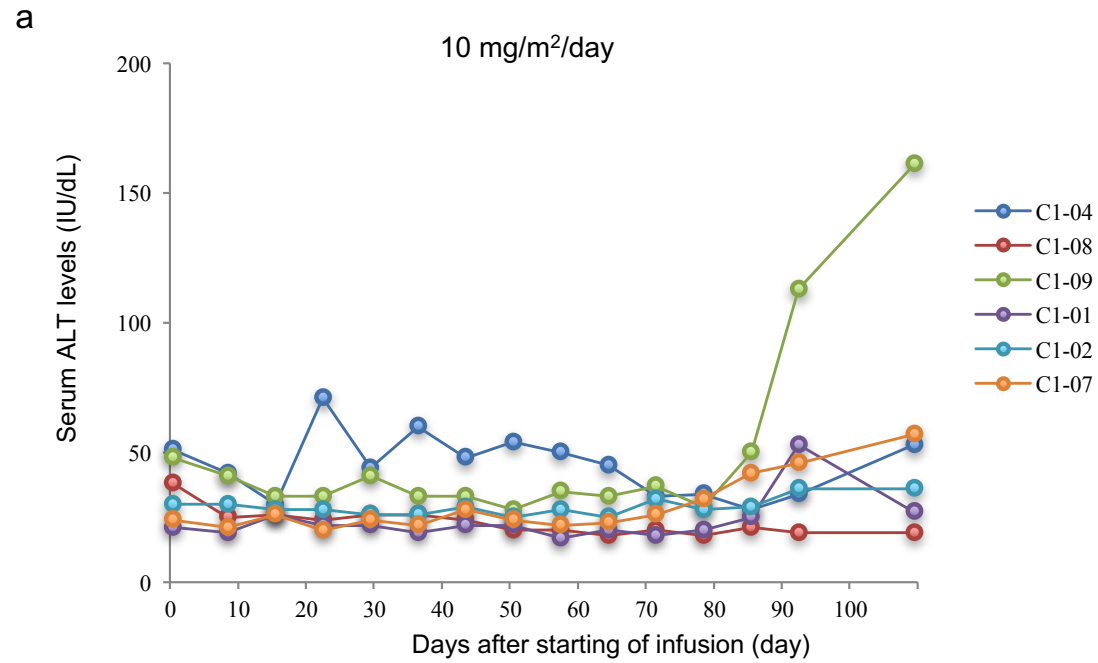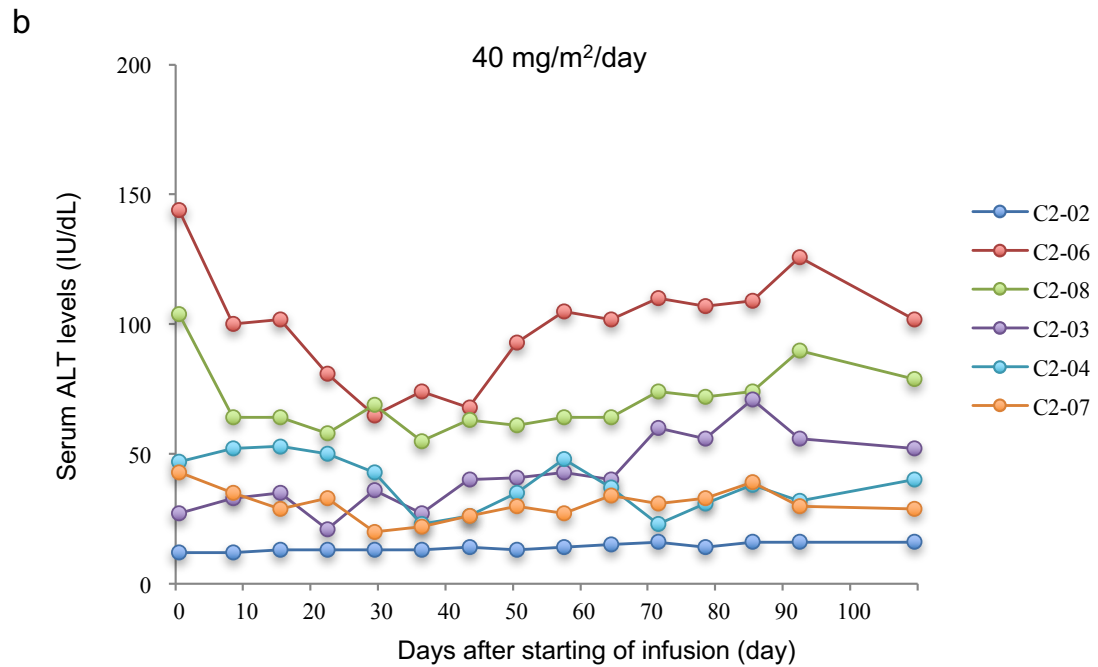

Supplementary Figure 1. Change in serum ALT level after PRI-724 infusion  
 Serum ALT levels of individual patients dosed with 10 mg/m<sup>2</sup>/day PRI-724 (A) and 40 mg/m<sup>2</sup>/day PRI-724 (B) throughout the entire study period.

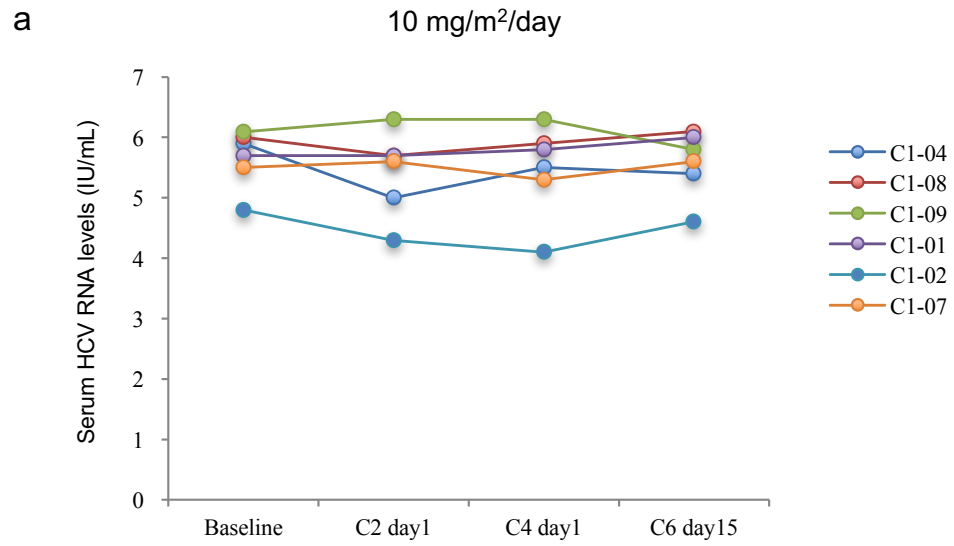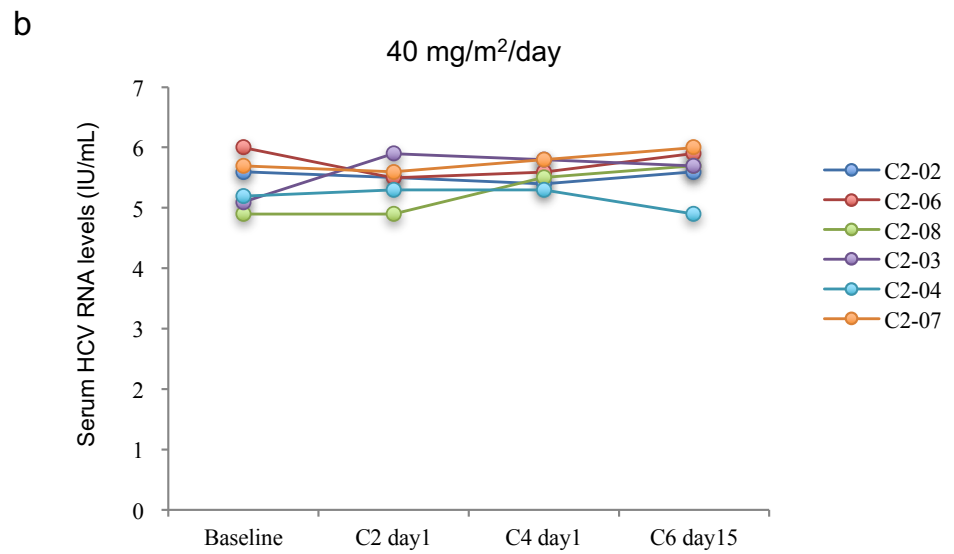

Supplementary Figure 2. Change in serum HCV RNA levels after PRI-724 infusion  
 Serum HCV RNA levels of individual patients dosed with 10 mg/m<sup>2</sup>/day PRI-724 (A) and 40 mg/m<sup>2</sup>/day PRI-724 (B) throughout the entire study period.

C2-03

Baseline

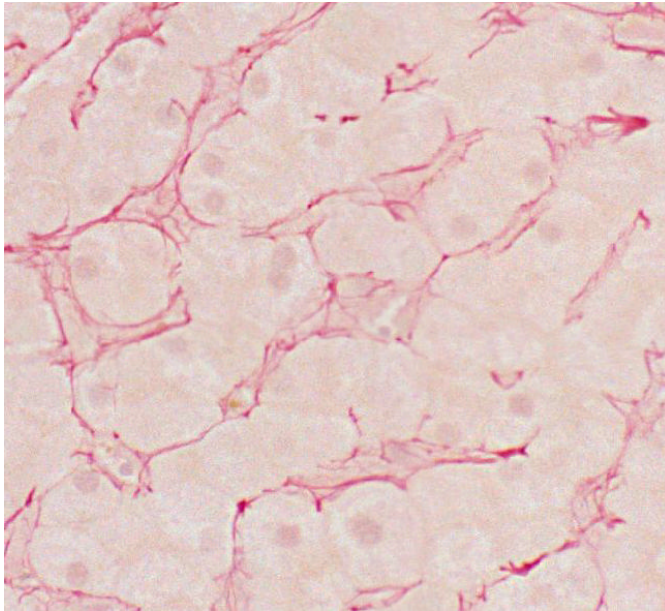

12 W

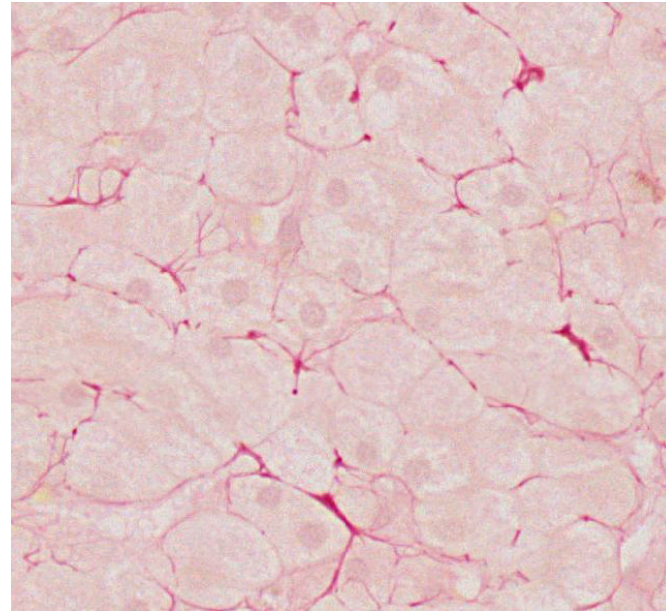

Supplementary Figure 3. Histopathology of hepatic lobules stained with Sirius red (X40)  
Liver biopsy sample from patient C2-03 patient (40 mg/m<sup>2</sup>/day PRI-724 in CP class B cohort).

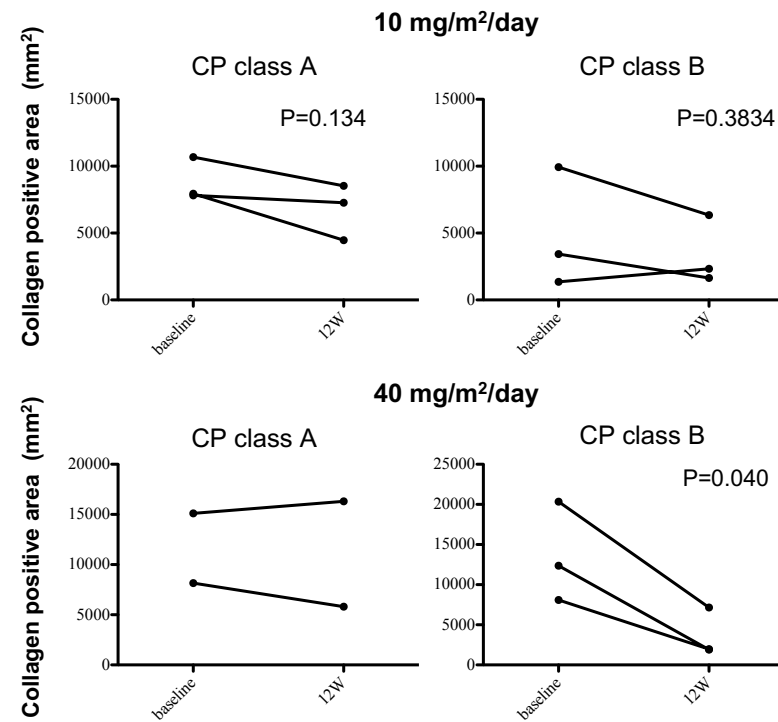

Supplementary Figure 4. Evaluation of anti-fibrotic effect in hepatic lobules of patients with CP class after PRI-724 infusion. The average of the measured collagen positive areas was compared between baseline and 12 weeks after PRI-724 infusion. Statistical analyses were performed on data from each CP class, using the paired T test.

| Cohort                     | CP class | Pt    | time     | Histological activity index |                    |                      |                     |       | HAI score |
|----------------------------|----------|-------|----------|-----------------------------|--------------------|----------------------|---------------------|-------|-----------|
|                            |          |       |          | Interface hepatitis         | Confluent necrosis | Lobular inflammation | Portal inflammation | Stage |           |
| 10 mg/m <sup>2</sup> /day  | A        | C1-04 | Baseline | 3                           | 0                  | 3                    | 3                   | 5     | 14        |
|                            |          |       | C6 day15 | 1                           | 0                  | 1                    | 2                   | 5     | 9         |
|                            |          | C1-08 | Baseline | 2                           | 0                  | 2                    | 1                   | 3     | 8         |
|                            |          |       | C6 day15 | 2                           | 0                  | 2                    | 2                   | 4     | 10        |
|                            |          | C1-09 | Baseline | 4                           | 0                  | 2                    | 2                   | 5     | 13        |
|                            |          |       | C6 day15 | 4                           | 0                  | 2                    | 3                   | 6     | 15        |
|                            | B        | C1-01 | Baseline | 3                           | 0                  | 1                    | 3                   | 6     | 13        |
|                            |          |       | C6 day15 | 3                           | 0                  | 2                    | 2                   | 5     | 12        |
|                            |          | C1-02 | Baseline | 4                           | 0                  | 4                    | 3                   | 6     | 17        |
|                            |          |       | C6 day15 | 4                           | 0                  | 4                    | 3                   | 6     | 17        |
|                            |          | C1-07 | Baseline | 4                           | 0                  | 2                    | 4                   | 6     | 16        |
|                            |          |       | C6 day15 | 3                           | 0                  | 2                    | 2                   | 6     | 13        |
| 40 mg/m <sup>2</sup> /day  | A        | C2-02 | Baseline | 1                           | 0                  | 1                    | 2                   | 6     | 10        |
|                            |          |       | C6 day15 | 1                           | 0                  | 1                    | 1                   | 6     | 9         |
|                            |          | C2-06 | Baseline | 2                           | 0                  | 3                    | 3                   | 5     | 13        |
|                            |          |       | C6 day15 | 1                           | 0                  | 3                    | 3                   | 5     | 12        |
|                            |          | C2-08 | Baseline | 3                           | 0                  | 2                    | 3                   | 6     | 14        |
|                            |          |       | C6 day15 | 3                           | 0                  | 2                    | 3                   | 6     | 14        |
|                            | B        | C2-03 | Baseline | 3                           | 0                  | 2                    | 2                   | 6     | 13        |
|                            |          |       | C6 day15 | 2                           | 0                  | 2                    | 2                   | 6     | 12        |
|                            |          | C2-04 | Baseline | 2                           | 0                  | 2                    | 2                   | 6     | 12        |
|                            |          |       | C6 day15 | 2                           | 0                  | 2                    | 2                   | 5     | 11        |
|                            |          | C2-07 | Baseline | 3                           | 0                  | 3                    | 3                   | 6     | 15        |
|                            |          |       | C6 day15 | 3                           | 0                  | 2                    | 3                   | 5     | 13        |
| 160 mg/m <sup>2</sup> /day | B        | C3-01 | Baseline | 3                           | 0                  | 3                    | 3                   | 6     | 15        |
|                            |          |       | C6 day15 | -                           | -                  | -                    | -                   | -     | -         |
|                            |          | C3-03 | Baseline | 4                           | 0                  | 4                    | 4                   | 6     | 18        |
|                            |          |       | C6 day15 | -                           | -                  | -                    | -                   | -     | -         |

Supplementary Table 1. Changes in HAI score after PRI-724 infusion

| Cohort                     | CP class | Pt       | time     | Pericellular collagen positive area (mm <sup>2</sup> ) |          |          |          |
|----------------------------|----------|----------|----------|--------------------------------------------------------|----------|----------|----------|
|                            |          |          |          | MEAN                                                   | SD       | MIN      | MAX      |
| 10 mg/m <sup>2</sup> /day  | A        | C1-04    | Baseline | 7941.04                                                | 5055.83  | 4349.36  | 17861.64 |
|                            |          |          | C6 day15 | 4474.88                                                | 1671.73  | 2238.97  | 6567.69  |
|                            |          | C1-08    | Baseline | 10687.26                                               | 3881.57  | 7616.99  | 17962.5  |
|                            |          |          | C6 day15 | 8535.7                                                 | 3073.07  | 2592.28  | 11434.33 |
|                            | C1-09    | Baseline | 7823.31  | 2066.57                                                | 4607.71  | 11084.56 |          |
|                            |          | C6 day15 | 7264.51  | 3257.7                                                 | 924.84   | 9537.45  |          |
|                            | B        | C1-01    | Baseline | 1356.24                                                | 842.75   | 399.31   | 2563.96  |
|                            |          |          | C6 day15 | 2326.27                                                | 582.7    | 828.11   | 4420.73  |
|                            |          | C1-02    | Baseline | 9929.68                                                | 5756.04  | 3207.46  | 19999.75 |
|                            |          |          | C6 day15 | 6345.68                                                | 2173.2   | 3497.66  | 9278.52  |
| C1-07                      |          | Baseline | 3432.54  | 868.73                                                 | 1955.86  | 4380.62  |          |
|                            |          | C6 day15 | 1645.73  | 789.16                                                 | 349.18   | 2565.73  |          |
| 40 mg/m <sup>2</sup> /day  | A        | C2-02    | Baseline | 15108.34                                               | 2900.79  | 9914.35  | 18880.27 |
|                            |          |          | C6 day15 | 16303.44                                               | 1956.97  | 14158.73 | 19964.95 |
|                            |          | C2-06    | Baseline | 8151.49                                                | 1311.46  | 6553.53  | 10014.03 |
|                            |          |          | C6 day15 | 5807.05                                                | 2228.55  | 1623.79  | 7766.8   |
|                            | C2-08    | Baseline | 1583.44  | 855.48                                                 | 169.87   | 2597     |          |
|                            |          | C6 day15 | -        | -                                                      | -        | -        |          |
|                            | B        | C2-03    | Baseline | 20334.77                                               | 789.73   | 19376.31 | 21550.99 |
|                            |          |          | C6 day15 | 7162.12                                                | 534.41   | 6279.27  | 7889.49  |
|                            |          | C2-04    | Baseline | 12359.76                                               | 1947.24  | 10285.35 | 15754.79 |
|                            |          |          | C6 day15 | 1913.51                                                | 1974.47  | 447.68   | 5790.3   |
| C2-07                      | Baseline | 8096.4   | 2984.35  | 4617.14                                                | 12488.34 |          |          |
|                            | C6 day15 | 1974.02  | 1353.24  | 523.17                                                 | 3866.89  |          |          |
| 160 mg/m <sup>2</sup> /day | B        | C3-01    | Baseline | 2907.83                                                | 1627.01  | 1941.7   | 5924.78  |
|                            |          |          | C6 day15 | -                                                      | -        | -        | -        |
|                            | C3-03    | Baseline | 27093.33 | 15791.98                                               | 10353.18 | 53842.08 |          |
|                            |          | C6 day15 | -        | -                                                      | -        | -        |          |

Supplementary Table 2. Changes of pericellular collagen positive areas in the hepatic lobules after PRI-724 infusion

| Cohort                     | CP class | Pt       | time     | Child-Pugh score |         |                 |         |                  | C-P score |
|----------------------------|----------|----------|----------|------------------|---------|-----------------|---------|------------------|-----------|
|                            |          |          |          | Coma             | Ascites | Total Bilirubin | Albumin | Prothrombin Time |           |
| 10 mg/m <sup>2</sup> /day  | A        | C1-04    | Baseline | 1                | 1       | 1               | 1       | 1                | 5         |
|                            |          |          | C6 day15 | 1                | 1       | 1               | 1       | 2                | 6         |
|                            |          | C1-08    | Baseline | 1                | 1       | 1               | 1       | 1                | 5         |
|                            |          |          | C6 day15 | 1                | 1       | 1               | 1       | 1                | 5         |
|                            |          | C1-09    | Baseline | 1                | 1       | 1               | 1       | 1                | 5         |
|                            | C6 day15 |          | 1        | 1                | 1       | 1               | 1       | 5                |           |
|                            | B        | C1-01    | Baseline | 1                | 1       | 1               | 2       | 2                | 7         |
|                            |          |          | C6 day15 | 1                | 1       | 1               | 2       | 2                | 7         |
|                            |          | C1-02    | Baseline | 1                | 2       | 1               | 3       | 2                | 9         |
|                            |          |          | C6 day15 | 1                | 2       | 2               | 3       | 2                | 10        |
| C1-07                      |          | Baseline | 1        | 1                | 1       | 2               | 2       | 7                |           |
|                            | C6 day15 | 1        | 1        | 1                | 2       | 2               | 7       |                  |           |
| 40 mg/m <sup>2</sup> /day  | A        | C2-02    | Baseline | 1                | 1       | 1               | 1       | 2                | 6         |
|                            |          |          | C6 day15 | 1                | 1       | 1               | 1       | 1                | 5         |
|                            |          | C2-06    | Baseline | 1                | 1       | 1               | 1       | 1                | 5         |
|                            |          |          | C6 day15 | 1                | 1       | 1               | 1       | 1                | 5         |
|                            |          | C2-08    | Baseline | 1                | 1       | 1               | 2       | 1                | 6         |
|                            |          |          | C6 day15 | 1                | 1       | 1               | 1       | 1                | 5         |
|                            | B        | C2-03    | Baseline | 1                | 1       | 1               | 2       | 2                | 7         |
|                            |          |          | C6 day15 | 1                | 1       | 1               | 2       | 2                | 7         |
|                            |          | C2-04    | Baseline | 1                | 1       | 1               | 2       | 2                | 7         |
|                            |          |          | C6 day15 | 1                | 1       | 1               | 2       | 2                | 7         |
|                            |          | C2-07    | Baseline | 1                | 2       | 1               | 3       | 1                | 8         |
|                            |          |          | C6 day15 | 1                | 1       | 1               | 2       | 1                | 6         |
| 160 mg/m <sup>2</sup> /day | B        | C3-01    | Baseline | 1                | 2       | 2               | 2       | 2                | 9         |
|                            |          |          | C4 day1* | 1                | 1       | 1               | 2       | 1                | 6         |
|                            |          | C3-03    | Baseline | 1                | 1       | 2               | 2       | 2                | 8         |
|                            |          |          | C6 day15 | -                | -       | -               | -       | -                | -         |

\* C3-01 shows the data of C4 day1.

Supplementary Table 3. Changes in C-P score after PRI-724 infusion



|                            |          | N | MEAN  | SD    | MIN | MEDIAN | MAX |
|----------------------------|----------|---|-------|-------|-----|--------|-----|
| 10 mg/m <sup>2</sup> /day  | Baseline | 6 | 220   | 163.3 | 100 | 175    | 530 |
|                            | C4 day1  | 6 | 256.7 | 151.3 | 110 | 190    | 520 |
|                            | C6 day15 | 6 | 240   | 146   | 100 | 185    | 480 |
| 40 mg/m <sup>2</sup> /day  | Baseline | 6 | 528.3 | 261.4 | 200 | 535    | 820 |
|                            | C4 day1  | 6 | 425   | 237.4 | 160 | 370    | 750 |
|                            | C6 day15 | 6 | 465   | 247.3 | 180 | 480    | 730 |
| 160 mg/m <sup>2</sup> /day | Baseline | 2 | 295   | 21.2  | 280 | 295    | 310 |
|                            | C4 day1  | 1 | 160   | -     | 160 | 160    | 160 |
|                            | C6 day15 | 1 | 260   | -     | 260 | 260    | 260 |

Supplementary Table 4. Changes in serum PTH levels (pg/mL) after PRI-724 infusion

|                            |          | N | MEAN  | SD    | MIN  | MEDIAN | MAX  |
|----------------------------|----------|---|-------|-------|------|--------|------|
| 10 mg/m <sup>2</sup> /day  | Baseline | 6 | 18.55 | 4.13  | 11.6 | 19.6   | 23   |
|                            | C4 day1  | 6 | 21.32 | 6.63  | 10.2 | 23.2   | 27.5 |
|                            | C6 day15 | 6 | 22.07 | 9.01  | 10.2 | 23.65  | 32.1 |
| 40 mg/m <sup>2</sup> /day  | Baseline | 6 | 20.18 | 6.18  | 14.6 | 17.95  | 31.7 |
|                            | C4 day1  | 6 | 19.23 | 4.93  | 14.2 | 18.15  | 27.2 |
|                            | C6 day15 | 6 | 22.8  | 7.31  | 17.1 | 19.7   | 36.3 |
| 160 mg/m <sup>2</sup> /day | Baseline | 2 | 37.45 | 13.93 | 27.6 | 37.45  | 47.3 |
|                            | C4 day1  | 1 | 38.7  | -     | 38.7 | 38.7   | 38.7 |
|                            | C6 day15 | 1 | 40.9  | -     | 40.9 | 40.9   | 40.9 |

Supplementary Table 5. Changes in serum Bone Specific Alkaline Phosphatase (BAP) levels (ug/L) after PRI-724 infusion

|                            |          | N | MEAN  | SD   | MIN  | MEDIAN | MAX  |
|----------------------------|----------|---|-------|------|------|--------|------|
| 10 mg/m <sup>2</sup> /day  | Baseline | 6 | 6.37  | 4.01 | 1.5  | 7.2    | 11   |
|                            | C4 day1  | 6 | 9.55  | 2.5  | 6.6  | 10     | 13   |
|                            | C6 day15 | 6 | 10.15 | 2.49 | 7.3  | 10.5   | 14   |
| 40 mg/m <sup>2</sup> /day  | Baseline | 6 | 9.37  | 4.88 | 4.3  | 8.25   | 16.9 |
|                            | C4 day1  | 6 | 10.95 | 7.85 | 4.8  | 8.9    | 26   |
|                            | C6 day15 | 6 | 11.1  | 6.59 | 5.9  | 8.8    | 23.5 |
| 160 mg/m <sup>2</sup> /day | Baseline | 2 | 17.45 | 0.78 | 16.9 | 17.45  | 18   |
|                            | C4 day1  | 1 | 17    | -    | 17   | 17     | 17   |
|                            | C6 day15 | 1 | 8.2   | -    | 8.2  | 8.2    | 8.2  |

Supplementary Table 6. Changes in serum osteocalcin levels (ng/mL) after PRI-724 infusion

|                            |          | N | MEAN  | SD    | MIN | MEDIAN | MAX |
|----------------------------|----------|---|-------|-------|-----|--------|-----|
| 10 mg/m <sup>2</sup> /day  | Baseline | 6 | 170.8 | 78.1  | 66  | 160    | 284 |
|                            | C4 day1  | 6 | 174.8 | 68.9  | 67  | 175    | 275 |
|                            | C6 day15 | 6 | 184.2 | 100.9 | 81  | 165    | 370 |
| 40 mg/m <sup>2</sup> /day  | Baseline | 6 | 154.7 | 109.9 | 28  | 169.5  | 270 |
|                            | C4 day1  | 6 | 119.2 | 93.5  | 12  | 104    | 243 |
|                            | C6 day15 | 6 | 171.2 | 128.1 | 13  | 162.5  | 347 |
| 160 mg/m <sup>2</sup> /day | Baseline | 2 | 138   | 36.8  | 112 | 138    | 164 |
|                            | C4 day1  | 1 | 99    | -     | 99  | 99     | 99  |
|                            | C6 day15 | 1 | 35    | -     | 35  | 35     | 35  |

Supplementary Table 7. Changes in urine C-terminal telopeptide of type I collagen degradation products (CTX) levels ( $\mu\text{g}/\text{mmol} \cdot \text{Cr}$ ) after PRI-724 infusion
